# Supplementary material
Source: publisher figshare collection journal article supplement (https://tandf.figshare.com/ndownloader/files/6407379)
Supplement: Supplementary file 1 [file 6407379]

**Supplemental Data**

APPENDIX: Underlying diseases and complications

Underlying diseases

Central nervous system: cerebral stroke, schizophrenia, bipolar disorder, dementia

Cardiovascular system: congestive heart failure, cardiac valve disease, coronary artery disease, hypertension

Respiratory diseases: bronchial asthma, chronic obstructive pulmonary disease

Digestive system: cirrhosis, chronic hepatitis, peptic ulcer

Urinary system: chronic renal failure or dysfunction

Metabolic diseases: diabetes, cancer, acquired immune deficiency syndrome (AIDS)

**Complications**

Central nervous system: hypoxic encephalopathy, cerebral stroke

Cardiovascular system: acute myocardial infarction, deep vein thrombosis, abdomen compartment syndrome

Respiratory system: respiratory failure, pulmonary oedema, respiratory distress syndrome, pneumonia

Digestive system: UGI bleeding, acute pancreatitis, liver failure, anastomotic leakage

Urinary system: acute renal failure, urinary tract infection

Musculoskeletal system: compartment syndrome, osteomyelitis, complications associated with amputation limb reconstructions, complications associated with surgical amputation

Haematological system: disseminated intravascular coagulation, coagulopathy, thrombocytopenia

Infections: sepsis, wound infections, post operation infections, bleeding, surgical wound dehiscence
